# Supplementary material for: Fast fabrication of transparent and multi-luminescent TEMPO-oxidized nanofibrillated cellulose nanopaper functionalized with lanthanide complexes
Source: Royal Society of Chemistry journal article supplement (doi:10.1039/c4tc02622e), 2015-01-01
Supplement: c4tc02622e1.pdf [file c4tc02622e1.pdf]

## Supporting information

### Fast fabrication of transparent and multi-luminescent TEMPO-oxidized nanofibrillated cellulose nanopaper functionalized with lanthanide complexes

Miao Miao,<sup>a</sup> Jingpeng Zhao,<sup>a</sup> Xin Feng,<sup>\*a</sup> Yang Cao,<sup>c</sup> Shaomei Cao,<sup>a</sup> Yafei Zhao,  
Xiaoqian Ge,<sup>a</sup> Lining Sun,<sup>\*a</sup> Liyi Shi<sup>a,b</sup> and Jianhui Fang<sup>\*b</sup>

<sup>a</sup> Research Center of Nano Science and Technology, Shanghai University, Shanghai 200444, P. R. China. Fax: 86-21-66136038; Tel: 86-21-66137257; E-mail: fengxin@shu.edu.cn; lnsun@shu.edu.cn

<sup>b</sup> Department of Chemistry, Shanghai University, Shanghai 200444, P. R. China. Fax: 86-21-66132830; Tel: 86-21-66132830; E-mail: jhfang@shu.edu.cn

<sup>c</sup> School of Materials Sciences and Engineering, Shanghai University, Shanghai 200444, P. R. China.

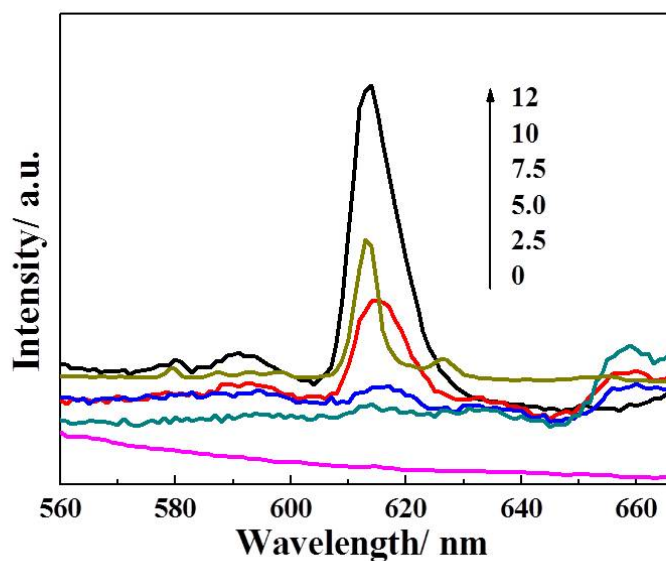

**Fig. S1** Emission spectra of Eu-ONFC nanopaper with different  $\text{Eu}(\text{dbm})_3(\text{H}_2\text{O})_2$  content.

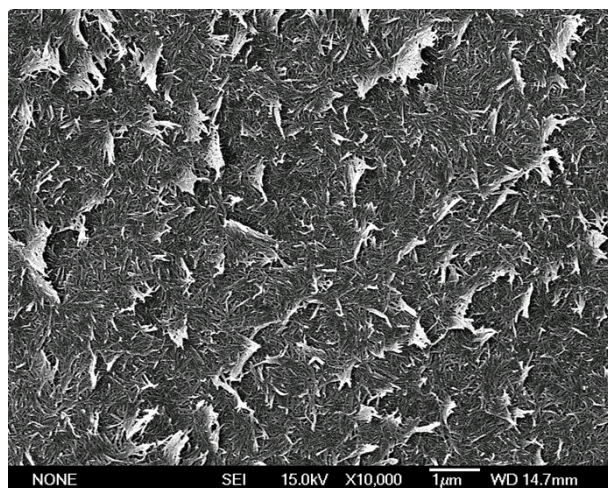

**Fig. S2** Typical SEM image of the luminescent Eu-ONFC nanopaper with 12 mg  $\text{Eu}(\text{dbm})_3(\text{H}_2\text{O})_2$ .

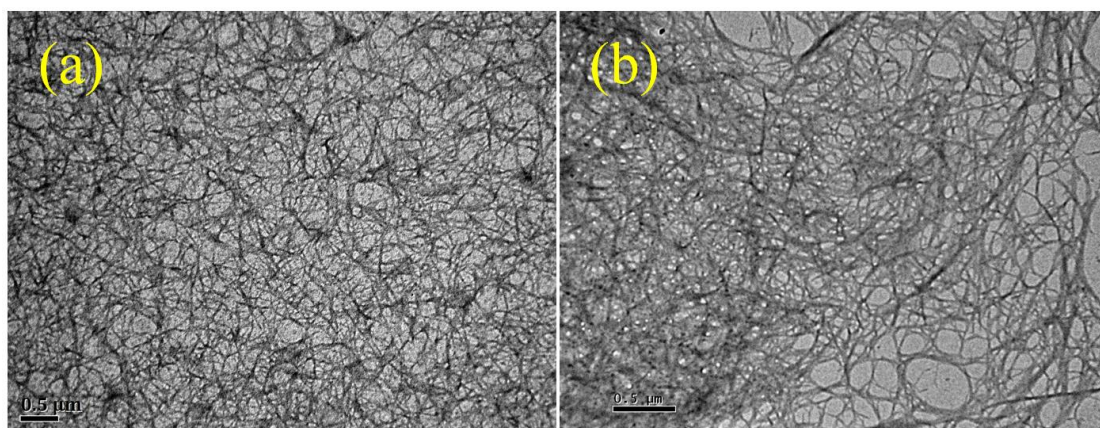

**Fig. S3** TEM images of NFC (a) and ONFC (b).
